# Supplementary material for: Syntaphilin Ubiquitination Regulates Mitochondrial Dynamics and Tumor Cell Movements
Source: Oxford University Press journal article supplement (doi:10.1158/0008-5472.can-18-0595), 2018-06-15
Supplement: 00085472can180595-sup-197567_2_supp_4793880_p9lfhp.docx [file 00085472can180595-sup-197567_2_supp_4793880_p9lfhp.docx]

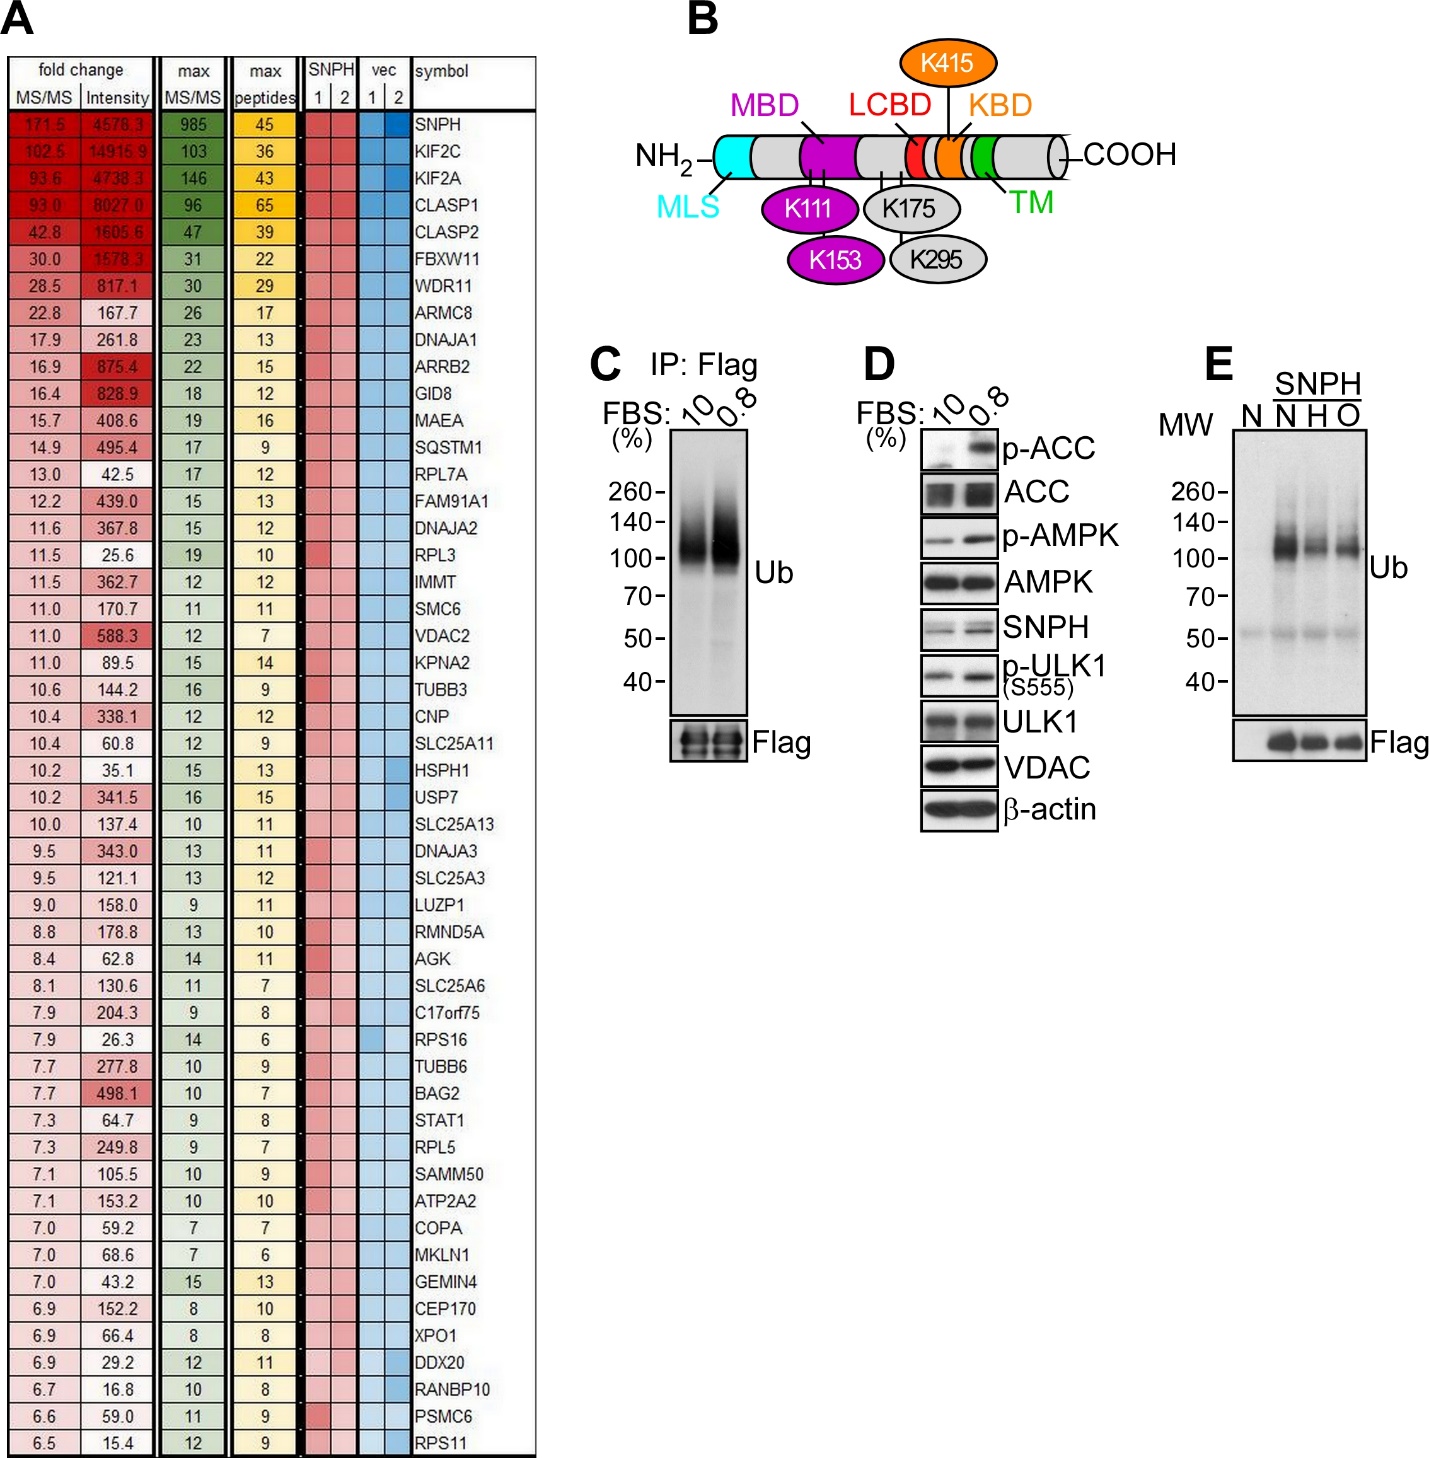


**Fig. S1**. Regulation of SNPH ubiquitination. **A,** Heat map of SNPH-associated proteins in PC3 cells. The MS/MS fold changes, intensity and peptides analyzed are reported for two independent experiments with vector control (vec) or SNPH transfectants. **B,** Schematic diagram of SNPH. The position of ubiquitinated residues identified by mass spectrometry is indicated. MBD, microtubule-binding domain; LCBD, LC8-binding domain; KBD, kinesin-binding domain; MLS, mitochondrial-localization sequence; TM, transmembrane domain. **C,** PC3 cells transfected with Flag-SNPH were maintained in 10% or 0.8% FBS for 16 h, immunoprecipitated with an antibody to Flag and analyzed by Western blotting. TCE, total cell extracts. **D,** PC3 cells were incubated in 10% or 0.8% FBS for 16 h and analyzed by Western blotting. p, phosphorylated. **E,** PC3 cells transfected with Flag-SNPH were cultured in normoxia (N), hypoxia (H, 1% O2 for 24 h) or in the presence of an oxidative stress stimulus (O, 0.5 mM PQ for 16 h), and analyzed by Western blotting.
