# Supplementary material for: Syntaphilin Ubiquitination Regulates Mitochondrial Dynamics and Tumor Cell Movements
Source: Oxford University Press journal article supplement (doi:10.1158/0008-5472.can-18-0595), 2018-06-15
Supplement: 00085472can180595-sup-197567_2_supp_4793882_p9lhhp.docx [file 00085472can180595-sup-197567_2_supp_4793882_p9lhhp.docx]

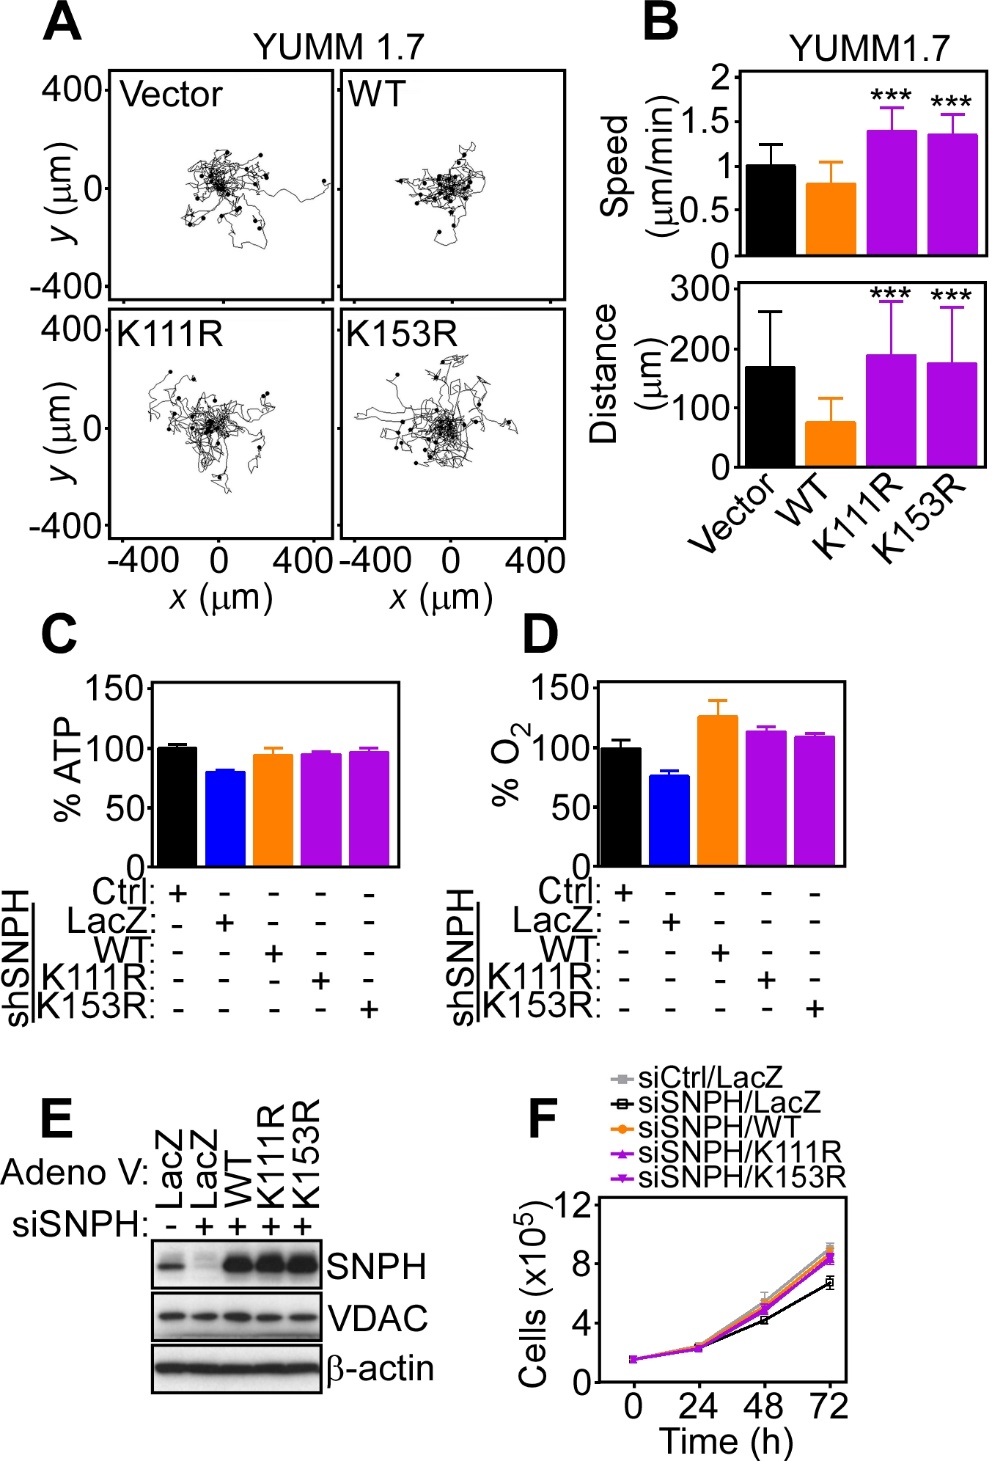


**Fig. S3**. SNPH ubiquitination in tumor chemotaxis and bioenergetics. **A,** Yumm 1.7 cells were transfected with vector, WT SNPH or SNPH mutant K111R or K153R and analyzed by 2D chemotaxis. Tracings correspond to the movement of an individual cell. **B,** The conditions are as in **A**, and transfected Yumm 1.7 cells were quantified for speed of cell migration (top, n=40-45) or total distance traveled (bottom, n=40-45). Data are the mean±SD. ***, p<0.0001 by two-tailed Student’s t test. **C** and **D**, PC3 cells were silenced for endogenous SNPH by siRNA, transfected with the indicated cDNA constructs as in **A** and analyzed for ATP production (**C**) or oxygen consumption rate (OCR, **D**). Data are the mean±SD (n=3). **E** and **F**. PC3 cells were transfected with control siRNA or SNPH-directed siRNA and reconstituted with adenoviral-encoded LacZ, WT SNPH or ubiquitination-defective SNPH K111R or K135R mutant and analyzed by Western blotting (**E**) or cell proliferation at the indicated time intervals by direct cell counting (**F**). Data are the mean±SD (n=4).
